# Supplementary material
Source: Springer Nature journal article supplement (https://www.springermedizin.de/resource/supplementary/12885_2011_3163_MOESM3_ESM.pdf/9462742)

**A**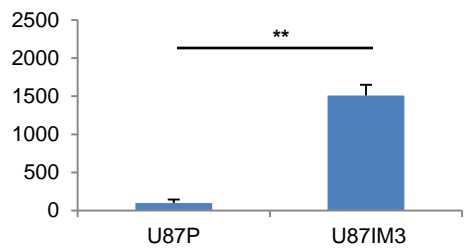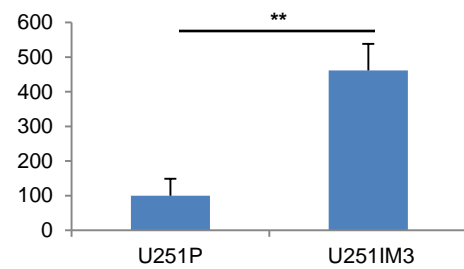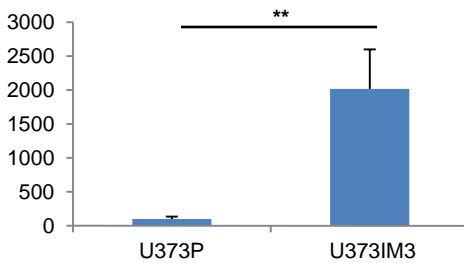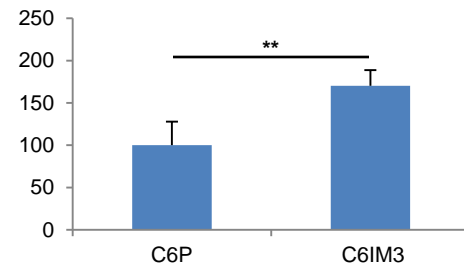

Relative invasion (%)  
cell type

**B**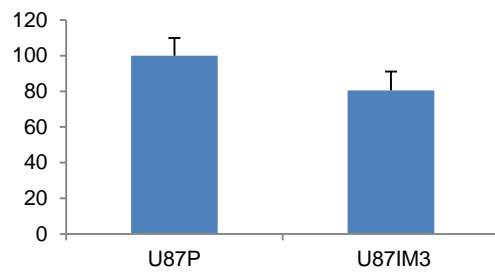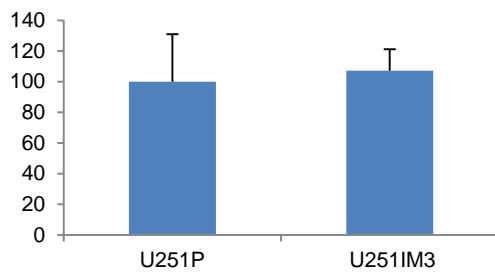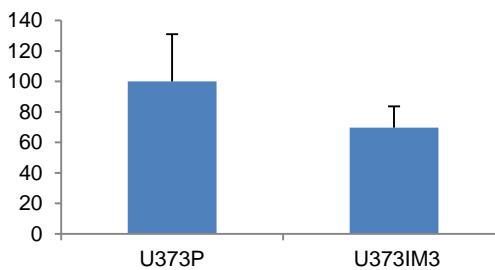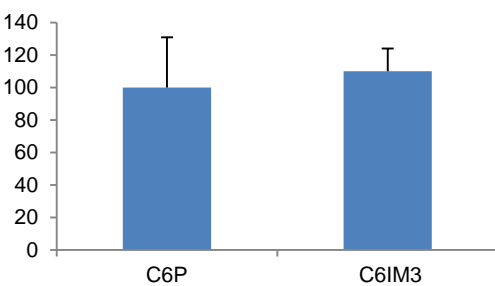

Relative attachment (%)  
cell type

**C**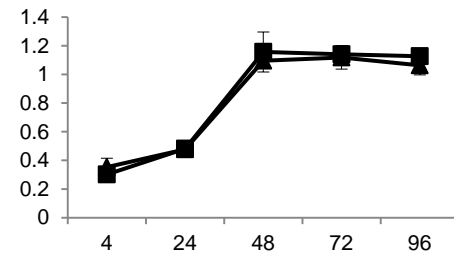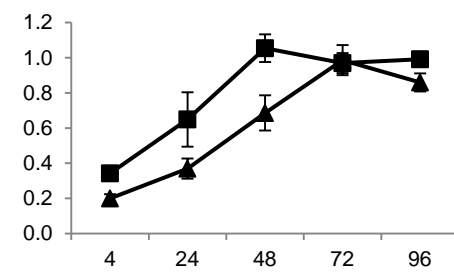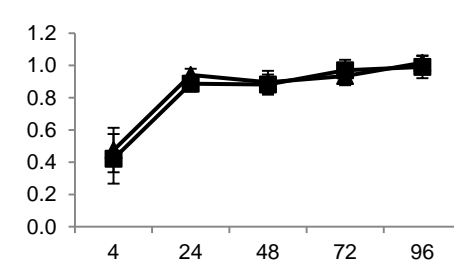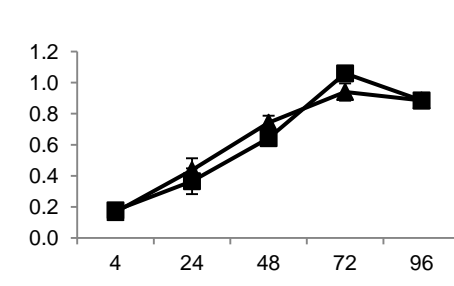

OD (@490)  
Time (h)

Supplement: MOESM3 [file 9462742]
